# Supplementary material for: Nanostructured ZnO/Ag Film Prepared by Magnetron Sputtering Method for Fast Response of Ammonia Gas Detection
Source: PubMed Central journal article supplement (PMC7221679; doi:10.3390/molecules25081899), 2020-04-20
Supplement: molecules-25-01899-s001.pdf [file molecules-25-01899-s001.pdf]

# Nanostructured ZnO/Ag Film Prepared by Magnetron Sputtering Method for Fast Response of Ammonia Gas Detection

Yiran Zheng <sup>1</sup>, Min Li <sup>1</sup>, Xiaoyan Wen <sup>1</sup>, Ho-Pui Ho <sup>2</sup> and Haifei Lu <sup>1,\*</sup>

<sup>1</sup> School of Science, Wuhan University of Technology, Wuhan 430070, China; yiranzzzzz@whut.edu.cn (Y.Z.); minli@whut.edu.cn (M.L.); wenxy@whut.edu.cn (X.W.)

<sup>2</sup> Department of Biomedical Engineering, The Chinese University of Hong Kong, Shatin, Hong Kong, China; aaron.ho@cuhk.edu.hk

\* Correspondence: haifeilv@whut.edu.cn

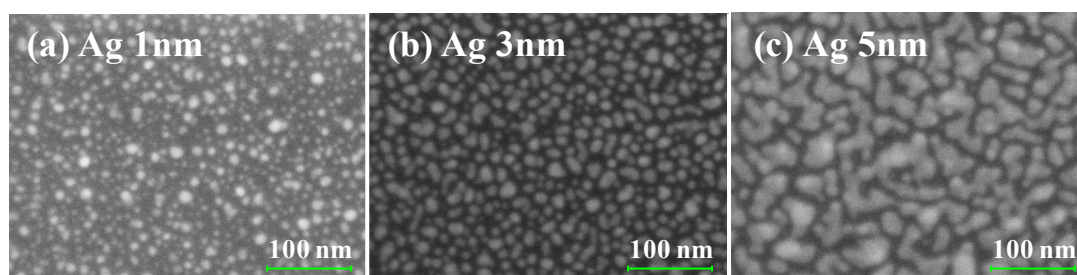

Figure S1. The SEM micrograph of Ag layers with (a) 1 nm, (b) 3 nm, and (c) 5 nm.

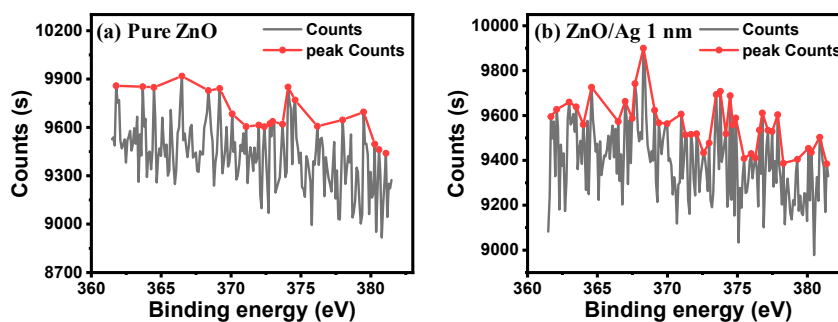

Figure S2. The XPS spectrum of Ag element measured on the pure ZnO and ZnO/Ag (1 nm) film.

Table S1. The parameters and calculations of the average crystallite size of the ZnO crystal using Scherrer equation.

|               | K     | $\lambda/\text{nm}$ | $\beta$   | $\theta$ | D/nm   |
|---------------|-------|---------------------|-----------|----------|--------|
| Pure ZnO      | 0.943 | 0.154               | 0.0098298 | 0.296    | 15.450 |
| ZnO/Ag (1 nm) | 0.943 | 0.154               | 0.0051156 | 0.301    | 29.734 |
| ZnO/Ag (3 nm) | 0.943 | 0.154               | 0.0086982 | 0.301    | 17.487 |
| ZnO/Ag (5 nm) | 0.943 | 0.154               | 0.0069072 | 0.301    | 22.021 |

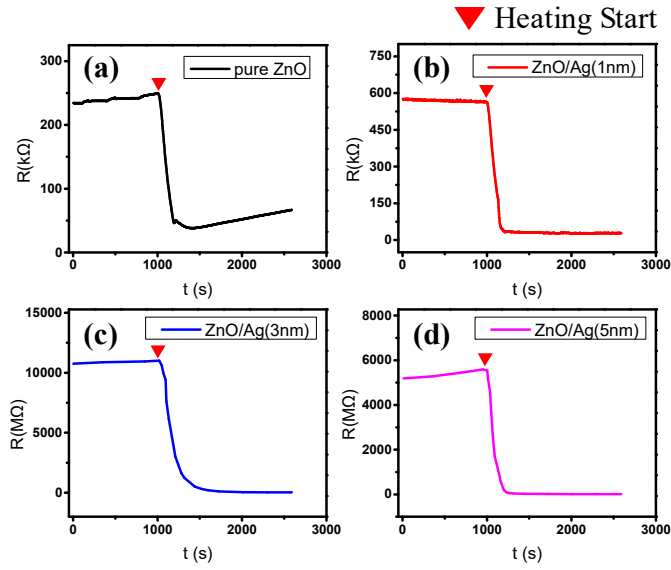

Figure S3. The resistance of ZnO films with different Ag thickness before and after heating.

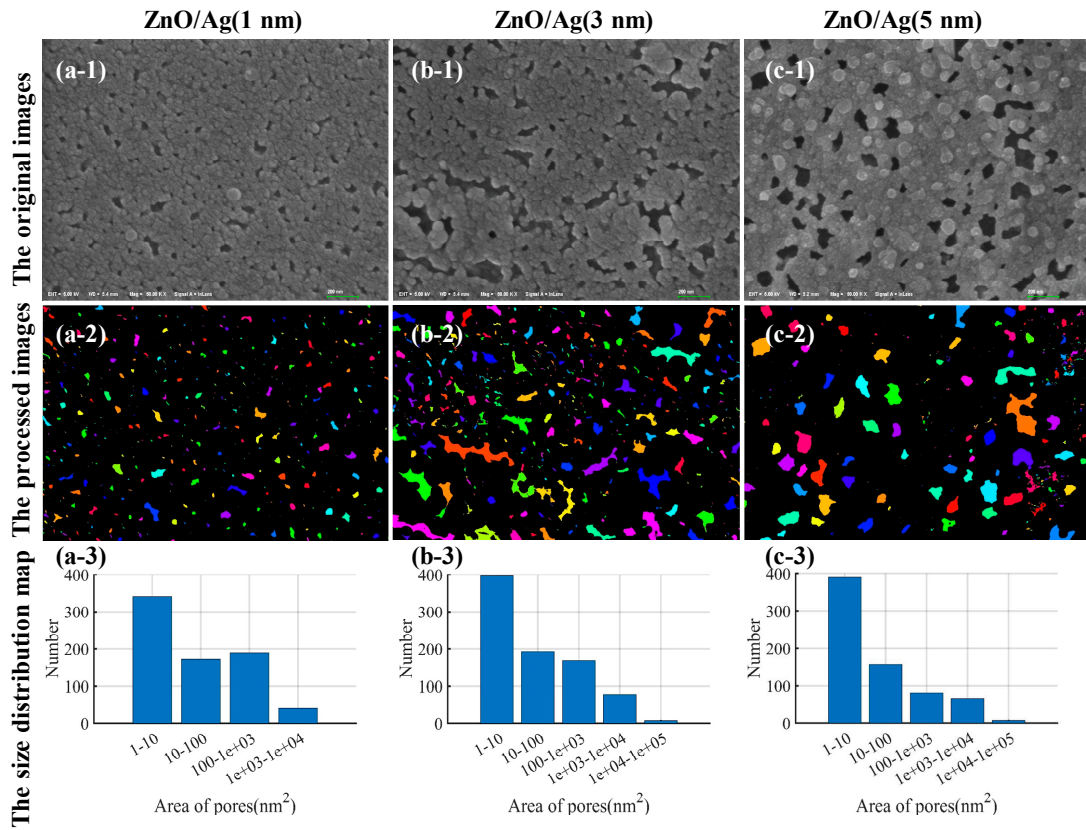

Figure S4. The statistics analysis of ZnO films with (a) 1 nm, (b) 3 nm and (c) 5 nm Ag: (1) SEM images of the three nanostructured film and (2) corresponding colored figures of the nanopores in the films. (3) The distribution diagrams of pores on the three ZnO/Ag films.

**Table S2.** The statistics summary of area and quantity of nanopores in the three nanostructured films.

|               | Total Area of Film Surface (nm <sup>2</sup> ) | Quantity of all Pores | Total Area of Pore Entrance (nm <sup>2</sup> ) | Area Ratio of Pore Entrance and Film Surface | Total Area of Pore Entrance above 1963.4954 nm (nm <sup>2</sup> ) |
|---------------|-----------------------------------------------|-----------------------|------------------------------------------------|----------------------------------------------|-------------------------------------------------------------------|
| ZnO/Ag (1 nm) | 3417867.4073                                  | 743                   | 143340.1763                                    | 0.041938                                     | 27368.6753                                                        |
| ZnO/Ag (3 nm) | 3417867.4073                                  | 843                   | 405265.0646                                    | 0.11857                                      | 289380.5096                                                       |
| ZnO/Ag (5 nm) | 3417867.4073                                  | 605                   | 353010.5060                                    | 0.10328                                      | 303789.3974                                                       |

We have calculated the average crystallite size of the ZnO crystal using Scherrer equation  $D = K\lambda/(\beta \cos\theta)$ , where D is the average crystallite size, K is the shape constant (K = 0.89 when the particles are spherical or K = 0.943 when the particles are cubic),  $\lambda$  is the X-ray wavelength (0.154 nm),  $\beta$  is the half-width of the full maximum (HWFHM) and  $\theta$  is the angle value. The average crystallite sizes of the ZnO/Ag (1, 3, 5) are 29.73 nm, 17.49 nm, 22.02 nm, respectively. Scherrer equation applies only to unstressed films. Thus, the average crystallite size of pure ZnO films is 15.45 nm for reference only.

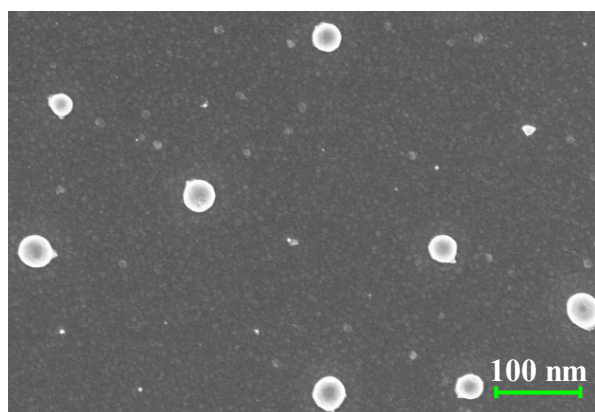

**Figure S5.** The SEM micrograph of up-Ag 3 nm/ZnO films.

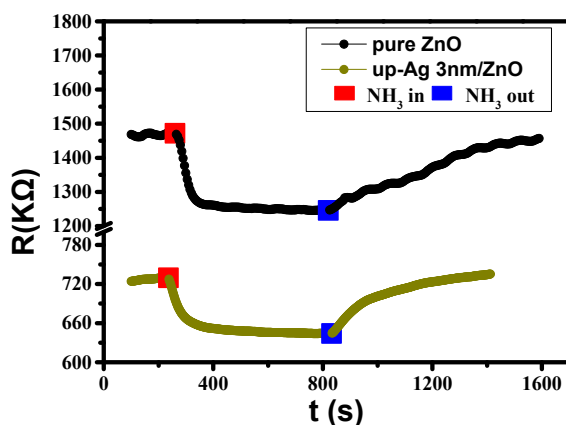

**Figure S6.** Sensing performance of ZnO films with 5 nm Ag exposed to 300 ppm NH<sub>3</sub>, comparing to pure ZnO.

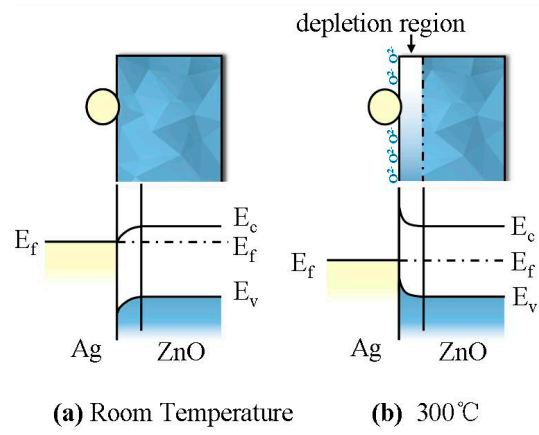

**Figure S7.** Schematic of the band diagram of silver and ZnO nanograins under **(a)** room temperature and **(b)** 300 °C.
